# Supplementary material
Source: HighWire-hosted journal article supplement (https://erj.ersjournals.com/highwire/filestream/121386/field_highwire_adjunct_files/0/ERJ-51084-2015.pdf)
Supplement: ERJ-51084-2015.pdf [file ERJ-51084-2015.pdf]

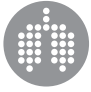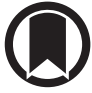

CrossMark

**“GINA 2015: the latest iteration of a magnificent journey.” Jean Bousquet and Marc Humbert. *Eur Respir J* 2015; 46: 579–582.**

The authors of the above mentioned editorial would like to clarify their statement regarding the evidence levels used in formulating the Global Initiative for Asthma report. Therefore, the closing sentences from the second paragraph of the editorial:

“Moreover, the evidence is drawn from randomised controlled trials only. Thus, recommendations do not apply for many patients due to the very strict inclusion criteria of patients in randomised controlled trials [10], such as smokers, obese patients and those with multimorbidity. Real life and observational studies should have been considered as well [11].”

Have now been corrected to read:

“In most guidelines, the evidence is drawn from randomised controlled trials only. Thus, recommendations do not apply for many patients due to the very strict inclusion criteria of these trials [10], for example excluding patients such as smokers, obese patients and those with multimorbidity. GINA should be commended for also considering real life and observational studies [11].”

*Eur Respir J* 2015; 46: 1 | DOI: 10.1183/13993003.51084-2015
